# Supplementary material for: Improvement in the active management of the third stage of labor for the prevention of postpartum hemorrhage in Tanzania: a cross-sectional study
Source: PubMed Central journal article supplement (PMC5998542; doi:10.1186/s12884-018-1873-3), 2018-06-13
Supplement: 12884_2018_1873_MOESM1_ESM.pdf [file 12884_2018_1873_MOESM1_ESM.pdf]

**MATERNAL AND NEWBORN QUALITY OF CARE FACILITY ASSESSMENT  
Labor & Delivery Observation Checklist**

Q12

|  |
|--|
|  |
|--|

| Cover Page      |                                  |
|-----------------|----------------------------------|
| Facility name   | Facility number                  |
| Observer number | Today's date<br>(day/month/year) |

*FIND A HEALTH WORKER INVOLVED IN DELIVERY CARE SERVICES. IF THIS IS A NEW RESPONDENT, OBTAIN INFORMED CONSENT BELOW. IF THE PERSON IS NOT A NEW RESPONDENT, PROCEED TO Q5. BEFORE OBSERVING THE CONSULTATION, MAKE SURE TO OBTAIN PERMISSION FROM BOTH THE SERVICE PROVIDER AND THE CLIENT. ALSO MAKE SURE THAT THE PROVIDER KNOWS THAT YOU ARE NOT THERE TO EVALUATE HIM OR HER, AND THAT YOU ARE NOT AN "EXPERT" TO BE CONSULTED DURING THE SESSION.*

*READ ORAL CONSENT SCRIPT TO HEALTH WORKER.  
[insert text of consent script here]*

Q5: Ask health worker Do I have your permission to be present at this consultation?

Yes, consent is given → go to Q6

No, consent is not given → observation of this health worker must END; if available, approach another health worker for participation.

|                                                                                                                                                                                                                                                                                                                                                                                                                                                                                                                                                                                                                                                                                                                                                                                                                                                                                                                                                                                        |                                                                                                                                                                                                                                                                                                                                  |            |   |        |            |   |  |  |   |  |  |   |  |  |   |  |  |   |  |  |   |  |  |   |  |  |   |  |             |    |  |
|----------------------------------------------------------------------------------------------------------------------------------------------------------------------------------------------------------------------------------------------------------------------------------------------------------------------------------------------------------------------------------------------------------------------------------------------------------------------------------------------------------------------------------------------------------------------------------------------------------------------------------------------------------------------------------------------------------------------------------------------------------------------------------------------------------------------------------------------------------------------------------------------------------------------------------------------------------------------------------------|----------------------------------------------------------------------------------------------------------------------------------------------------------------------------------------------------------------------------------------------------------------------------------------------------------------------------------|------------|---|--------|------------|---|--|--|---|--|--|---|--|--|---|--|--|---|--|--|---|--|--|---|--|--|---|--|-------------|----|--|
| <p>Q6: Health worker line number<br/>(from staff listing)</p>                                                                                                                                                                                                                                                                                                                                                                                                                                                                                                                                                                                                                                                                                                                                                                                                                                                                                                                          | <p>Q7: Sex of health worker</p> <table style="width: 100%; border-collapse: collapse;"> <tr> <td style="text-align: right; padding-right: 20px;">Male</td> <td style="text-align: right;">1</td> </tr> <tr> <td style="text-align: right; padding-right: 20px;">Female</td> <td style="text-align: right;">2</td> </tr> </table> | Male       | 1 | Female | 2          |   |  |  |   |  |  |   |  |  |   |  |  |   |  |  |   |  |  |   |  |  |   |  |             |    |  |
| Male                                                                                                                                                                                                                                                                                                                                                                                                                                                                                                                                                                                                                                                                                                                                                                                                                                                                                                                                                                                   | 1                                                                                                                                                                                                                                                                                                                                |            |   |        |            |   |  |  |   |  |  |   |  |  |   |  |  |   |  |  |   |  |  |   |  |  |   |  |             |    |  |
| Female                                                                                                                                                                                                                                                                                                                                                                                                                                                                                                                                                                                                                                                                                                                                                                                                                                                                                                                                                                                 | 2                                                                                                                                                                                                                                                                                                                                |            |   |        |            |   |  |  |   |  |  |   |  |  |   |  |  |   |  |  |   |  |  |   |  |  |   |  |             |    |  |
| <table style="width: 100%; border-collapse: collapse;"> <tr> <td style="width: 20%; padding: 5px;">Q8: Health worker category</td> <td style="width: 30%; padding: 5px;">Category 1</td> <td style="width: 50%; padding: 5px; text-align: right;">1</td> </tr> <tr> <td></td> <td style="padding: 5px;">Category 2</td> <td style="text-align: right;">2</td> </tr> <tr> <td></td> <td></td> <td style="text-align: right;">3</td> </tr> <tr> <td></td> <td></td> <td style="text-align: right;">4</td> </tr> <tr> <td></td> <td></td> <td style="text-align: right;">5</td> </tr> <tr> <td></td> <td></td> <td style="text-align: right;">6</td> </tr> <tr> <td></td> <td></td> <td style="text-align: right;">7</td> </tr> <tr> <td></td> <td></td> <td style="text-align: right;">8</td> </tr> <tr> <td></td> <td></td> <td style="text-align: right;">9</td> </tr> <tr> <td></td> <td style="padding: 5px;">Category 10</td> <td style="text-align: right;">10</td> </tr> </table> | Q8: Health worker category                                                                                                                                                                                                                                                                                                       | Category 1 | 1 |        | Category 2 | 2 |  |  | 3 |  |  | 4 |  |  | 5 |  |  | 6 |  |  | 7 |  |  | 8 |  |  | 9 |  | Category 10 | 10 |  |
| Q8: Health worker category                                                                                                                                                                                                                                                                                                                                                                                                                                                                                                                                                                                                                                                                                                                                                                                                                                                                                                                                                             | Category 1                                                                                                                                                                                                                                                                                                                       | 1          |   |        |            |   |  |  |   |  |  |   |  |  |   |  |  |   |  |  |   |  |  |   |  |  |   |  |             |    |  |
|                                                                                                                                                                                                                                                                                                                                                                                                                                                                                                                                                                                                                                                                                                                                                                                                                                                                                                                                                                                        | Category 2                                                                                                                                                                                                                                                                                                                       | 2          |   |        |            |   |  |  |   |  |  |   |  |  |   |  |  |   |  |  |   |  |  |   |  |  |   |  |             |    |  |
|                                                                                                                                                                                                                                                                                                                                                                                                                                                                                                                                                                                                                                                                                                                                                                                                                                                                                                                                                                                        |                                                                                                                                                                                                                                                                                                                                  | 3          |   |        |            |   |  |  |   |  |  |   |  |  |   |  |  |   |  |  |   |  |  |   |  |  |   |  |             |    |  |
|                                                                                                                                                                                                                                                                                                                                                                                                                                                                                                                                                                                                                                                                                                                                                                                                                                                                                                                                                                                        |                                                                                                                                                                                                                                                                                                                                  | 4          |   |        |            |   |  |  |   |  |  |   |  |  |   |  |  |   |  |  |   |  |  |   |  |  |   |  |             |    |  |
|                                                                                                                                                                                                                                                                                                                                                                                                                                                                                                                                                                                                                                                                                                                                                                                                                                                                                                                                                                                        |                                                                                                                                                                                                                                                                                                                                  | 5          |   |        |            |   |  |  |   |  |  |   |  |  |   |  |  |   |  |  |   |  |  |   |  |  |   |  |             |    |  |
|                                                                                                                                                                                                                                                                                                                                                                                                                                                                                                                                                                                                                                                                                                                                                                                                                                                                                                                                                                                        |                                                                                                                                                                                                                                                                                                                                  | 6          |   |        |            |   |  |  |   |  |  |   |  |  |   |  |  |   |  |  |   |  |  |   |  |  |   |  |             |    |  |
|                                                                                                                                                                                                                                                                                                                                                                                                                                                                                                                                                                                                                                                                                                                                                                                                                                                                                                                                                                                        |                                                                                                                                                                                                                                                                                                                                  | 7          |   |        |            |   |  |  |   |  |  |   |  |  |   |  |  |   |  |  |   |  |  |   |  |  |   |  |             |    |  |
|                                                                                                                                                                                                                                                                                                                                                                                                                                                                                                                                                                                                                                                                                                                                                                                                                                                                                                                                                                                        |                                                                                                                                                                                                                                                                                                                                  | 8          |   |        |            |   |  |  |   |  |  |   |  |  |   |  |  |   |  |  |   |  |  |   |  |  |   |  |             |    |  |
|                                                                                                                                                                                                                                                                                                                                                                                                                                                                                                                                                                                                                                                                                                                                                                                                                                                                                                                                                                                        |                                                                                                                                                                                                                                                                                                                                  | 9          |   |        |            |   |  |  |   |  |  |   |  |  |   |  |  |   |  |  |   |  |  |   |  |  |   |  |             |    |  |
|                                                                                                                                                                                                                                                                                                                                                                                                                                                                                                                                                                                                                                                                                                                                                                                                                                                                                                                                                                                        | Category 10                                                                                                                                                                                                                                                                                                                      | 10         |   |        |            |   |  |  |   |  |  |   |  |  |   |  |  |   |  |  |   |  |  |   |  |  |   |  |             |    |  |

*READ ORAL CONSENT SCRIPT TO CLIENT. IF CLIENT IS INCAPACITATED, NEXT OF KIN OR FAMILY FRIEND ACCOMPANYING CLIENT MAY GIVE CONSENT. CONSENT FOR CLIENT CANNOT BE GIVEN BY HEALTH WORKER OR FACILITY IN-CHARGE. CLIENT OR PROXY CONSENT MUST BE OBTAINED PRIOR TO START OF OBSERVATION.  
[insert text of consent script here]*

**MATERNAL AND NEWBORN QUALITY OF CARE FACILITY ASSESSMENT**  
**Labor & Delivery Observation Checklist**

Q9: Ask *client* Do I have your permission to be present while you are receiving services today?

Yes, consent is given → go to Q10

No, consent is not given → observation of this client must **END**; if available, approach another client for participation.

|                                          |                           |   |                                                                                                                                                                   |
|------------------------------------------|---------------------------|---|-------------------------------------------------------------------------------------------------------------------------------------------------------------------|
| Q10: Who gave consent                    | Client                    | 1 |                                                                                                                                                                   |
|                                          | Next of kin/family friend | 2 |                                                                                                                                                                   |
| Q11: Client code                         |                           |   | <i>Start client code at 1 for the first client observed at a given facility.</i>                                                                                  |
| Q12: Client initials or other identifier |                           |   | <i>Write client initials or identifier in box at top right of cover first page (marked Q12) to help identify this client's case when observing multiple cases</i> |
| Q13: Record time the observation started |                           |   |                                                                                                                                                                   |

*MOST CLIENTS WILL BE IN LABOR WHEN ADMITTED AND OBSERVATION STARTS, HOWEVER SOME CLIENTS MAY HAVE ALREADY DELIVERED AND COME TO THE FACILITY WHEN THEY ARE EXPERIENCED A COMPLICATION (PPH OR PE/E). ALSO, SOME CLIENTS MAY EXPERIENCE A COMPLICATION (PE/E) BEFORE GOING INTO LABOR AND BE TREATED IN LABOR WARD.*

|                                   |                           |   |                                                 |
|-----------------------------------|---------------------------|---|-------------------------------------------------|
| Q14: Client is admitted for:      | Labor and delivery        | 1 | → GO TO SECTION 1 TO BEGIN THE OBSERVATION      |
|                                   | Complication              | 2 |                                                 |
| Q15: Where is client coming from: |                           |   |                                                 |
|                                   | Other health facility     | 1 |                                                 |
|                                   | ANC ward at this facility | 2 |                                                 |
|                                   | Home/someplace else       | 3 |                                                 |
| Q16: Type of complication         | Postpartum hemorrhage     | 1 | → GO TO PPH CHECKLIST TO BEGIN THE OBSERVATION  |
|                                   | Pre-eclampsia/eclampsia   | 2 | → GO TO PE/E CHECKLIST TO BEGIN THE OBSERVATION |

MATERNAL AND NEWBORN QUALITY OF CARE FACILITY ASSESSMENT

Labor & Delivery Observation Checklist

Section 1: Initial Client Assessment

| Question                                                                                                                                                                                                       | Yes | No | DK | Go to           |
|----------------------------------------------------------------------------------------------------------------------------------------------------------------------------------------------------------------|-----|----|----|-----------------|
| Q100: Was this section observed?                                                                                                                                                                               | 1   | 0  |    | No → Q200       |
| <i>PLEASE ANSWER Q100 BEFORE PROCEEDING: WAS THIS SECTION OBSERVED? IF SECTION NOT OBSERVED, SKIP TO NEXT SECTION.</i>                                                                                         |     |    |    |                 |
| <i>RECORD WHETHER THE PROVIDER CARRIED OUT THE FOLLOWING STEPS AND/OR EXAMINATIONS: (SOME OF THE FOLLOWING STEPS MAY BE PERFORMED SIMULTANEOUSLY OR BY MORE THAN ONE PROVIDER)</i>                             |     |    |    |                 |
| <b>INTRODUCTION AND HISTORY TAKING</b>                                                                                                                                                                         |     |    |    |                 |
| Q103: Respectfully greets the pregnant woman                                                                                                                                                                   | 1   | 0  | 8  |                 |
| Q104: Encourages the women to have a support person present during labor and birth                                                                                                                             | 1   | 0  | 8  |                 |
| Q105: Asks woman (and support person) if she has any questions                                                                                                                                                 | 1   | 0  | 8  |                 |
| Q106: Checks client card OR asks client her age, length of pregnancy, and parity                                                                                                                               | 1   | 0  | 8  |                 |
| Q107: Asks whether she has experienced any of the following for current pregnancy:                                                                                                                             |     |    |    |                 |
| 01) Vaginal bleeding                                                                                                                                                                                           | 1   | 0  | 8  |                 |
| 02) Fever                                                                                                                                                                                                      | 1   | 0  | 8  |                 |
| 03) Severe headaches and/or blurred vision                                                                                                                                                                     | 1   | 0  | 8  |                 |
| 04) Swollen face or hands                                                                                                                                                                                      | 1   | 0  | 8  |                 |
| 05) Convulsions or loss of consciousness                                                                                                                                                                       | 1   | 0  | 8  |                 |
| 06) Severe difficulty breathing                                                                                                                                                                                | 1   | 0  | 8  |                 |
| 07) Persistent cough for 2 weeks or longer                                                                                                                                                                     | 1   | 0  | 8  |                 |
| 08) Severe abdominal pain                                                                                                                                                                                      | 1   | 0  | 8  |                 |
| 09)                                                                                                                                                                                                            | 1   | 0  | 8  |                 |
| 10)                                                                                                                                                                                                            | 1   | 0  | 8  |                 |
| 11) Whether the client has felt a decrease or stop in fetal movement                                                                                                                                           | 1   | 0  | 8  |                 |
| 12) If there are any other problems the client is concerned about                                                                                                                                              | 1   | 0  | 8  |                 |
| Q108: Checks woman's HIV status (checks card or asks woman)                                                                                                                                                    | 1   | 0  | 8  |                 |
| Q108A: Offers woman HIV test if status unknown                                                                                                                                                                 | 1   | 0  | 8  |                 |
| Q108B: Is woman HIV positive? ( <i>observer: listen and record answer; circle Don't Know if status is unknown or is not discussed. If unknown status observe if provider conducts counseling and testing</i> ) | 1   | 0  | 8  | No/DK → Q110    |
| Q109: Asks about or counsels on the following topics for HIV positive mothers:                                                                                                                                 |     |    |    |                 |
| 01) Asks if client is currently taking ARVs                                                                                                                                                                    | 1   | 0  | 8  | No/DK → Q109_02 |
| 01a) Asks client when she took last dose ARVs                                                                                                                                                                  | 1   | 0  | 8  |                 |
| 02) Explains why the mother should take ARVs                                                                                                                                                                   | 1   | 0  | 8  |                 |
| 03) Explains when and how the mother should take ARVs                                                                                                                                                          | 1   | 0  | 8  |                 |
| 04) Administers ARVs to mother                                                                                                                                                                                 | 1   | 0  | 8  |                 |
| 05) Explains why the newborn should take ARVs                                                                                                                                                                  | 1   | 0  | 8  |                 |
| 06) Explains when and how newborn should take ARVs                                                                                                                                                             | 1   | 0  | 8  |                 |
| Q109A: Client has any previous pregnancies? ( <i>observer: listen and record answer</i> )                                                                                                                      | 1   | 0  | 8  | No/DK → Q112    |
| Q110: Asks about complications during previous pregnancies:                                                                                                                                                    |     |    |    |                 |
| 01) Heavy bleeding during or after delivery                                                                                                                                                                    | 1   | 0  | 8  |                 |
| 02) Anemia                                                                                                                                                                                                     | 1   | 0  | 8  |                 |
| 03) High blood pressure                                                                                                                                                                                        | 1   | 0  | 8  |                 |
| 04) Convulsions                                                                                                                                                                                                | 1   | 0  | 8  |                 |
| 05) Multiple pregnancies (twins or above)                                                                                                                                                                      | 1   | 0  | 8  |                 |
| 06) Prolonged labour                                                                                                                                                                                           | 1   | 0  | 8  |                 |
| 07) C-section                                                                                                                                                                                                  | 1   | 0  | 8  |                 |
| 08) Assisted delivery (forceps, vacuum extraction)                                                                                                                                                             | 1   | 0  | 8  |                 |
| 09) Prior neonatal death (death of baby less than 1 month old)                                                                                                                                                 | 1   | 0  | 8  |                 |
| 10) Prior stillbirth (baby born dead that does not breathe or cry)                                                                                                                                             | 1   | 0  | 8  |                 |
| 11) Prior abortion/miscarriage (loss of pregnancy)                                                                                                                                                             | 1   | 0  | 8  |                 |
| <b>EXAMINATION</b>                                                                                                                                                                                             |     |    |    |                 |
| Q112: Washes his/her hands with soap and water or uses alcohol hand rub before any initial examination                                                                                                         | 1   | 0  | 8  |                 |
| Q113: Explains procedures to woman (support person if present or if situation allows) before proceeding                                                                                                        | 1   | 0  | 8  |                 |
| Q114: Takes temperature                                                                                                                                                                                        | 1   | 0  | 8  |                 |
| Q115: Takes pulse                                                                                                                                                                                              | 1   | 0  | 8  |                 |
| Q116: Takes blood pressure                                                                                                                                                                                     | 1   | 0  | 8  | No/DK → Q117    |
| 01) Take client's blood pressure in sitting or lateral position                                                                                                                                                | 1   | 0  | 8  |                 |
| 02) Take blood pressure with arm at heart level                                                                                                                                                                | 1   | 0  | 8  |                 |
| Q117: Asks/notes amount and colour of urine output                                                                                                                                                             | 1   | 0  | 8  |                 |
| Q118: Tests urine for presence of protein                                                                                                                                                                      | 1   | 0  | 8  |                 |

MATERNAL AND NEWBORN QUALITY OF CARE FACILITY ASSESSMENT

**Labor & Delivery Observation Checklist**

|                                                                            |                                                                                                                                            |   |                   |
|----------------------------------------------------------------------------|--------------------------------------------------------------------------------------------------------------------------------------------|---|-------------------|
| Q119: Performs general examination (e.g. for anemia, edema)                | 1                                                                                                                                          | 0 | 8                 |
| Q120: Performs the following steps for abdominal examination:              |                                                                                                                                            |   |                   |
| 01) Checks fundal height with measuring tape                               | 1                                                                                                                                          | 0 | 8                 |
| 02) Checks fetal presentation by palpation of abdomen                      | 1                                                                                                                                          | 0 | 8                 |
| 03) Checks fetal heart rate with fetoscope/doppler/ultrasound              | 1                                                                                                                                          | 0 | 8                 |
| Q121: Wash her/his hands with soap and water                               | 1                                                                                                                                          | 0 | 8                 |
| Q122: Wears sterile gloves for vaginal examination                         |                                                                                                                                            |   |                   |
| Q123: Informs the woman before conducting vaginal examination with respect |                                                                                                                                            |   |                   |
| Q131: Performs vaginal examination                                         | 1                                                                                                                                          | 0 | 8                 |
| Q132: Informs pregnant woman of findings                                   | 1                                                                                                                                          | 0 | 8                 |
| Q132A Was this woman referred for a c-section                              | 1                                                                                                                                          | 0 | 8 No –<br>→> Sec2 |
| Q132B Cause of referral                                                    | A Obstructed Labour<br>B Pre-eclampsia/eclampsia<br>C Placenta previa<br>D Previous scar<br>E Fetal distress<br>F Cord prolapse<br>G Other |   |                   |
| <i>END OF SECTION 1</i>                                                    |                                                                                                                                            |   |                   |

**MATERNAL AND NEWBORN QUALITY OF CARE FACILITY ASSESSMENT**  
**Labor & Delivery Observation Checklist**

| Section 2: Intermittent Observation of First Stage of Labor                                                                                                                                |             |    |    |              |
|--------------------------------------------------------------------------------------------------------------------------------------------------------------------------------------------|-------------|----|----|--------------|
| Question                                                                                                                                                                                   | Yes         | No | DK | Go to        |
| Q200: Was this section observed?                                                                                                                                                           | 1           | 0  |    | No → Q300    |
| <i>PLEASE ANSWER Q200 BEFORE PROCEEDING: WAS THIS SECTION OBSERVED? IF SECTION NOT OBSERVED, SKIP TO NEXT SECTION.</i>                                                                     |             |    |    |              |
| <i>RECORD WHETHER THE PROVIDER CARRIED OUT THE FOLLOWING STEPS AND/OR EXAMINATIONS: (SOME OF THE FOLLOWING STEPS MAY BE PERFORMED SIMULTANEOUSLY OR BY MORE THAN ONE PROVIDER)</i>         |             |    |    |              |
| <b>PROGRESS OF LABOR</b>                                                                                                                                                                   |             |    |    |              |
| Q205: At least once, explains what will happen in labor to woman (support person if present)                                                                                               | 1           | 0  | 8  |              |
| Q206: At least once, encourages woman to consume fluids/food during labor                                                                                                                  | 1           | 0  | 8  |              |
| Q207: At least once, encourages/assists woman to ambulate and assume different positions during labor                                                                                      | 1           | 0  | 8  |              |
| Q208: Observer: Is a support person present at some point during labor?                                                                                                                    | 1           | 0  | 8  |              |
| Q209:                                                                                                                                                                                      | 1           | 0  | 8  |              |
| Q210: Partograph used to monitor labor                                                                                                                                                     | 1           | 0  |    | No → Q216    |
| Q211: Action line on partograph reached                                                                                                                                                    | 1           | 0  | 8  | No/DK → Q216 |
| Q212: Record time action line was reached                                                                                                                                                  |             |    |    |              |
| Q213: If action line reached on partograph, was any <u>definitive</u> action taken?                                                                                                        | 1           | 0  | 8  | No/DK → Q216 |
| Q214: Record time action was taken                                                                                                                                                         |             |    |    |              |
| Q215: What definitive action was taken:                                                                                                                                                    | <b>Code</b> |    |    |              |
| Consult with specialist                                                                                                                                                                    | 1           |    |    |              |
| Refer to other facility for specialist                                                                                                                                                     | 2           |    |    |              |
| Prepare for assisted delivery                                                                                                                                                              | 3           |    |    |              |
| Prepare for c-section                                                                                                                                                                      | 4           |    |    |              |
| Other (specify _____)                                                                                                                                                                      | 6           |    |    |              |
| <b>EXAMINATION &amp; PROCEDURES</b>                                                                                                                                                        |             |    |    |              |
| Question                                                                                                                                                                                   | Yes         | No | DK | Go to        |
| Q216: Puts on clean protective clothing in preparation for birth (goggles, gown or apron)                                                                                                  | 1           | 0  | 8  |              |
| Q217: Washes his/her hands with soap and water or uses alcohol hand rub prior to any examination of woman                                                                                  | 1           | 0  | 8  |              |
| Q218: : Wears sterile surgical gloves                                                                                                                                                      | 1           | 0  | 8  |              |
| Q219: Drapes woman (one drape under buttocks, one over abdomen)                                                                                                                            | 1           | 0  | 8  |              |
| Q220: Explains procedures to woman (support person) before proceeding                                                                                                                      | 1           | 0  | 8  |              |
| Q220A: Number of vaginal examinations ( <i>observer: to the best of your ability, update the answer to this question during intermittent observation of first stage of labor</i> )         |             |    |    |              |
| Q220B: Augments labor with oxytocin                                                                                                                                                        | 1           | 0  | 8  |              |
|                                                                                                                                                                                            | 1           | 0  | 8  |              |
| Q220C: Performs artificial rupture of membrane                                                                                                                                             | 1           | 0  | 8  |              |
| Q220D: Administers antibiotics                                                                                                                                                             | 1           | 0  | 8  | No/DK → Q223 |
| Q221: Why were antibiotics administered?                                                                                                                                                   | <b>Code</b> |    |    |              |
| Treatment for chorioamnionitis                                                                                                                                                             | 1           |    |    |              |
| Management of pre-labor rupture of membranes                                                                                                                                               | 2           |    |    |              |
| Preparation for C-section                                                                                                                                                                  | 3           |    |    |              |
| Routine/prophylactic                                                                                                                                                                       | 4           |    |    |              |
| Don't know                                                                                                                                                                                 | 8           |    |    |              |
| Q222: Which antibiotic was administered? (CIRCLE ALL THAT APPLY)                                                                                                                           |             |    |    |              |
| Penicillin                                                                                                                                                                                 | A           |    |    |              |
| Ampicillin                                                                                                                                                                                 | B           |    |    |              |
| Gentamicin                                                                                                                                                                                 | C           |    |    |              |
| Metronidazole                                                                                                                                                                              | D           |    |    |              |
| Cephalosporin                                                                                                                                                                              | E           |    |    |              |
| Other                                                                                                                                                                                      | X           |    |    |              |
| Don't know                                                                                                                                                                                 | Z           |    |    |              |
| <b>PREPARATION FOR DELIVERY</b>                                                                                                                                                            |             |    |    |              |
| <i>CHECK TO SEE IF THE FOLLOWING EQUIPMENT AND SUPPLIES ARE LAID OUT IN PREPARATION FOR DELIVERY. IF SOME SUPPLIES ARE IN A BIRTH KIT, LOOK/ASK TO DETERMINE WHICH ITEMS ARE INCLUDED.</i> |             |    |    |              |
| Question                                                                                                                                                                                   | Yes         | No | DK | Go to        |
| Q223: Prepares uterotonic drug to use for AMTSL                                                                                                                                            | 1           | 0  | 8  | No/DK → Q225 |

**MATERNAL AND NEWBORN QUALITY OF CARE FACILITY ASSESSMENT**  
**Labor & Delivery Observation Checklist**

|                                                                                                         | <b>Code</b>                                                                                                                                |           |                      |              |
|---------------------------------------------------------------------------------------------------------|--------------------------------------------------------------------------------------------------------------------------------------------|-----------|----------------------|--------------|
| Q224: Which drug                                                                                        |                                                                                                                                            |           |                      |              |
| Oxytocin                                                                                                | 1                                                                                                                                          | 0         | 8                    |              |
| Ergometrine                                                                                             | 1                                                                                                                                          | 0         | 8                    |              |
| Syntometrine                                                                                            | 1                                                                                                                                          | 0         | 8                    |              |
| Misoprostol                                                                                             | 1                                                                                                                                          | 0         | 8                    |              |
| <b>Question</b>                                                                                         | <b>Yes</b>                                                                                                                                 | <b>No</b> | <b>DK</b>            | <b>Go to</b> |
| Q225: Timer (clock or watch with seconds hand)                                                          | 1                                                                                                                                          | 0         | 8                    |              |
| Q226: Self-inflating ventilation bag (250 or 500 mL)                                                    | 1                                                                                                                                          | 0         | 8                    |              |
| Q227: Newborn face mask size 0                                                                          | 1                                                                                                                                          | 0         | 8                    |              |
| Q228: Newborn face mask size 1                                                                          | 1                                                                                                                                          | 0         | 8                    |              |
| Q229: Suction bulb                                                                                      | 1                                                                                                                                          | 0         | 8                    |              |
| Q230: Catheter                                                                                          | 1                                                                                                                                          | 0         | 8                    |              |
| Q231: Suction machine                                                                                   | 1                                                                                                                                          | 0         | 8                    |              |
| Q232: At least two cloths/blankets (one to dry; one to cover)                                           | 1                                                                                                                                          | 0         | 8                    |              |
| Q233: Cap/hat for the newborn                                                                           | 1                                                                                                                                          | 0         | 8                    |              |
| Q234: Disposable cord ties or clamps                                                                    | 1                                                                                                                                          | 0         | 8                    |              |
| Q235: Sterile scissors or blade                                                                         | 1                                                                                                                                          | 0         | 8                    |              |
| Q236: Has the woman completed the first stage of labor?                                                 | 1                                                                                                                                          | 0         | Yes → Q300           |              |
| Q236A Was this woman referred for a c-section                                                           | 1                                                                                                                                          | 0         | 8 No –<br>→><br>Sec3 |              |
| Q236B Cause of referral                                                                                 | A Obstructed Labour<br>B Pre-eclampsia/eclampsia<br>C Placenta previa<br>D Previous scar<br>E Fetal distress<br>F Cord prolapse<br>G Other |           |                      |              |
| <i>IF FIRST STAGE OF LABOR IS NOT COMPLETE, CHECK ANSWERS IN THIS SECTION AGAIN 15-30 MINUTES LATER</i> |                                                                                                                                            |           |                      |              |
| <b>END OF SECTION 2</b>                                                                                 |                                                                                                                                            |           |                      |              |

**MATERNAL AND NEWBORN QUALITY OF CARE FACILITY ASSESSMENT**  
**Labor & Delivery Observation Checklist**

Section 3: Continuous Observation of Second & Third Stage of Labor

| Question                                                                                                                                                                            | Yes         | No               | DK        | Go to     |
|-------------------------------------------------------------------------------------------------------------------------------------------------------------------------------------|-------------|------------------|-----------|-----------|
| Q300: Was this section observed?                                                                                                                                                    | 1           | 0                |           | No → Q400 |
| <i>PLEASE ANSWER Q300 BEFORE PROCEEDING: WAS THIS SECTION OBSERVED? IF SECTION NOT OBSERVED, SKIP TO NEXT SECTION.</i>                                                              |             |                  |           |           |
| <i>RECORD WHETHER THE PROVIDER CARRIED OUT THE FOLLOWING STEPS AND/OR EXAMINATIONS: (SOME OF THE FOLLOWING STEPS MAY BE PERFORMED SIMULTANEOUSLY OR BY MORE THAN ONE PROVIDER).</i> |             |                  |           |           |
| <b>PREPARATION FOR DELIVERY</b>                                                                                                                                                     |             |                  |           |           |
| Q301: Puts on clean protective clothing in preparation for birth (goggles, gown or apron) <i>(yes if no contamination)</i>                                                          | 1           | 0                | 8         |           |
| Q302: Washes his/her hands with soap and water or uses alcohol hand rub before any examination of woman <i>(observer: circle yes if done previously and no contamination)</i>       | 1           | 0                | 8         |           |
| Q303: Wears sterile surgical gloves <i>(yes if no contamination)</i>                                                                                                                | 1           | 0                | 8         |           |
| Q304a: Performs episiotomy if indicated                                                                                                                                             | 1           | 0                | 8         |           |
| Q304b: States correct indication for episiotomy                                                                                                                                     | 1           | 0                | 8         |           |
| Q305: Presentation of baby                                                                                                                                                          | Cephalic    | Non-<br>cephalic |           |           |
| <b>DELIVERY &amp; UTEROTONIC</b>                                                                                                                                                    |             |                  |           |           |
| Q306: As baby's head is delivered, supports perineum                                                                                                                                | 1           | 0                | 8         |           |
| Q307: Record time of the delivery of the baby                                                                                                                                       |             |                  |           |           |
| Q308: Checks for another baby prior to giving the uterotonic                                                                                                                        | 1           | 0                | 8         |           |
| Q309: Second baby present? <i>(observer: circle 1 if multiple babies)</i>                                                                                                           | 1           | 0                |           |           |
| Q310: Administers uterotonic?                                                                                                                                                       | 1           | 0                |           | No → Q317 |
| Q311: Record time uterotonic given                                                                                                                                                  |             |                  |           |           |
| Q312: Timing of administration of uterotonic                                                                                                                                        | <b>Code</b> |                  |           |           |
| At delivery of anterior shoulder                                                                                                                                                    | 1           |                  |           |           |
| Within 1 min of delivery of baby                                                                                                                                                    | 2           |                  |           |           |
| Within 3 min of delivery of baby                                                                                                                                                    | 3           |                  |           |           |
| More than 3 min after delivery of baby                                                                                                                                              | 4           |                  |           |           |
| Q313: Which uterotonic given                                                                                                                                                        |             |                  |           |           |
| Oxytocin                                                                                                                                                                            | 1           |                  |           |           |
| Ergometrine                                                                                                                                                                         | 2           |                  |           |           |
| Syntometrine                                                                                                                                                                        | 3           |                  |           |           |
| Misoprostol                                                                                                                                                                         | 4           |                  |           |           |
| Q314: Record dose of uterotonic given <i>(observer: if necessary, ask afterwards)</i>                                                                                               |             |                  |           |           |
| Q315: Units of medication <i>(observer: if necessary, ask afterwards)</i>                                                                                                           |             |                  |           |           |
| IU                                                                                                                                                                                  | 1           |                  |           |           |
| mg                                                                                                                                                                                  | 2           |                  |           |           |
| mL                                                                                                                                                                                  | 3           |                  |           |           |
| mcg                                                                                                                                                                                 | 4           |                  |           |           |
| Q316: Route uterotonic given:                                                                                                                                                       |             |                  |           |           |
| IM                                                                                                                                                                                  | 1           |                  |           |           |
| IV                                                                                                                                                                                  | 2           |                  |           |           |
| Oral                                                                                                                                                                                | 3           |                  |           |           |
| Other                                                                                                                                                                               | 4           |                  |           |           |
| Q317: Record time the cord was clamped                                                                                                                                              |             |                  |           |           |
| <b>Question</b>                                                                                                                                                                     | <b>Yes</b>  | <b>No</b>        | <b>DK</b> |           |
| Q318: Applies traction to the cord while applying suprapubic counter traction                                                                                                       | 1           | 0                | 8         |           |
| Q319: Performs uterine massage immediately following the delivery of the placenta                                                                                                   | 1           | 0                | 8         |           |
| Q320: Was placenta delivered before administration of uterotonic? <i>(observer: circle Don't Know if no uterotonic was given)</i>                                                   | 1           | 0                | 8         |           |
| Q321: Assesses completeness of the placenta and membranes                                                                                                                           | 1           | 0                | 8         |           |
| Q322: Assesses for perineal and vaginal lacerations                                                                                                                                 | 1           | 0                | 8         |           |
| Q323: Observer: Did more than one health worker assist with the birth?                                                                                                              | 1           | 0                |           |           |
| Q324: Observer: Did mother gave birth in lithotomy position (on back)                                                                                                               | 1           | 0                |           |           |
| Q325: Observer: Is a support person (companion) for mother present at birth?                                                                                                        | 1           | 0                |           |           |
| <b>END OF SECTION 3</b>                                                                                                                                                             |             |                  |           |           |

MATERNAL AND NEWBORN QUALITY OF CARE FACILITY ASSESSMENT

Labor & Delivery Observation Checklist

Section 4: Immediate Newborn and Postpartum Care

| Question                                                                                                                                                                           | Yes         | No | Go to          |
|------------------------------------------------------------------------------------------------------------------------------------------------------------------------------------|-------------|----|----------------|
| Q400: Was this section observed?                                                                                                                                                   | 1           | 0  | No → Q601      |
| <i>PLEASE ANSWER Q400 BEFORE PROCEEDING: WAS THIS SECTION OBSERVED? IF SECTION NOT OBSERVED, SKIP TO NEXT SECTION.</i>                                                             |             |    |                |
| <i>RECORD WHETHER THE PROVIDER CARRIED OUT THE FOLLOWING STEPS AND/OR EXAMINATIONS: (SOME OF THE FOLLOWING STEPS MAY BE PERFORMED SIMULTANEOUSLY OR BY MORE THAN ONE PROVIDER)</i> |             |    |                |
| <b>IMMEDIATE CARE</b>                                                                                                                                                              |             |    |                |
| Q401: Immediately dries baby with towel                                                                                                                                            | 1           | 0  | 8              |
| Q402: Discards the wet towel                                                                                                                                                       | 1           | 0  | 8              |
| Q403: Is the baby breathing or crying?                                                                                                                                             | 1           | 0  | No → Q500      |
| <i>IF BABY IS NOT BREATHING OR CRYING, GO TO RESUSCITATION CHECKLIST (SECTION 5)</i>                                                                                               |             |    |                |
| Q404: Places baby on mother's abdomen "skin to skin"                                                                                                                               | 1           | 0  | 8              |
| Q405: Covers baby with dry towel                                                                                                                                                   | 1           | 0  | 8              |
| Q406: If not placed skin to skin, wraps baby in dry towel                                                                                                                          | 1           | 0  | 8              |
| Q407: Ties or clamps cord when pulsations stop, or by 2-3 minutes after birth (not immediately after birth)                                                                        | 1           | 0  | 8              |
| Q408: Cuts cord with sterile blade or sterile scissors                                                                                                                             | 1           | 0  | 8              |
| Q409: Observer: Is a support person (companion) for mother present?                                                                                                                | 1           | 0  |                |
| <b>HEALTH CHECK</b>                                                                                                                                                                |             |    |                |
| Q410: Checks baby's temperature 15 minutes after birth                                                                                                                             | 1           | 0  | 8              |
| Q411: Checks baby's skin color 15 minutes after birth                                                                                                                              | 1           | 0  | 8              |
| Q412: Takes mother's vital signs 15 minutes after birth                                                                                                                            | 1           | 0  | 8              |
| Q413: Palpates uterus 15 minutes after delivery of placenta                                                                                                                        | 1           | 0  | 8              |
| <b>FIRST HOUR AFTER BIRTH</b>                                                                                                                                                      |             |    |                |
| Q414: Mother and newborn kept in same room after delivery (rooming-in)                                                                                                             | 1           | 0  | 8              |
| Q415: Baby bathed within the first hour after birth                                                                                                                                | 1           | 0  | 8              |
| Q416: Baby kept skin to skin with mother for the first hour after birth                                                                                                            | 1           | 0  | 8              |
| Q417: observe breastfeeding initiated within the first hour after birth                                                                                                            | 1           | 0  | 8              |
| Q418: Provides tetracycline eye ointment 1% prophylaxis                                                                                                                            | 1           | 0  | 8              |
| Q419: Administers Vitamin K to newborn                                                                                                                                             | 1           | 0  | 8              |
| Q420: Is the mother HIV positive? ( <i>observer: listen and record answer; circle Don't Know if status is unknown or is not discussed</i> )                                        | 1           | 0  | 8 No/DK → Q422 |
| Q421: Administers ARVs to newborn                                                                                                                                                  | 1           | 0  | 8              |
| Q422: Administers antibiotics to mother postpartum if indicated                                                                                                                    | 1           | 0  | 8 No/DK → Q425 |
| Q423: Why were antibiotics administered?                                                                                                                                           | <b>Code</b> |    |                |
| Treatment for chorioamnionitis                                                                                                                                                     | 1           |    |                |
| Routine/prophylactic                                                                                                                                                               | 2           |    |                |
| Third stage/postpartum procedure                                                                                                                                                   | 3           |    |                |
| Don't know                                                                                                                                                                         | 8           |    |                |
| Q424: Which antibiotic was administered? (CIRCLE ALL THAT APPLY)                                                                                                                   |             |    |                |
| Penicillin                                                                                                                                                                         | A           |    |                |
| Ampicillin                                                                                                                                                                         | B           |    |                |
| Gentamicin                                                                                                                                                                         | C           |    |                |
| Metronidazole                                                                                                                                                                      | D           |    |                |
| Cephalosporin                                                                                                                                                                      | E           |    |                |
| Other                                                                                                                                                                              | X           |    |                |
| Don't know                                                                                                                                                                         | Z           |    |                |
| <b>CLEAN-UP AFTER BIRTH</b>                                                                                                                                                        |             |    |                |
| <i>RECORD WHETHER THE PROVIDER CARRIED OUT THE FOLLOWING STEPS AND/OR EXAMINATIONS: (SOME OF THE FOLLOWING STEPS MAY BE PERFORMED SIMULTANEOUSLY OR BY MORE THAN ONE PROVIDER)</i> |             |    |                |
| Question                                                                                                                                                                           | Yes         | No | Go to          |
| Q425: Disposes of all sharps in a puncture-proof container immediately after use                                                                                                   | 1           | 0  | 8              |
| Q426: Decontaminates all reusable instruments in 0.5% chlorine solution                                                                                                            | 1           | 0  | 8              |
| Q427: Sterilizes or uses high-level disinfection for all reusable instruments                                                                                                      | 1           | 0  | 8              |
| Q428: Disposes of all contaminated waste in leak-proof containers                                                                                                                  | 1           | 0  | 8              |
| Q429: Removes apron and wipe with chlorine solution                                                                                                                                | 1           | 0  | 8              |
| Q430: Washes his/her hands with soap and water or uses alcohol hand rub                                                                                                            | 1           | 0  | 8              |
| <i>(continued on next page)</i>                                                                                                                                                    |             |    |                |



MATERNAL AND NEWBORN QUALITY OF CARE FACILITY ASSESSMENT

Labor & Delivery Observation Checklist

| <b>CLEAN-UP AFTER NEWBORN RESUSCITATION</b>                                                                  |   |   |           |
|--------------------------------------------------------------------------------------------------------------|---|---|-----------|
| Q431: Was there a newborn resuscitation? ( <i>observer: check answer to Q500</i> )                           | 1 | 0 | No → Q439 |
| Q432: Disposes of disposable suction catheters and mucus extractors in a leak-proof container or plastic bag | 1 | 0 | 8         |
| Q433: Takes the bag and mask apart and inspects for cracks and tears                                         | 1 | 0 | 8         |
| Q434: Decontaminates the bag and mask in 0.5% chlorine solution                                              | 1 | 0 | 8         |
| Q435: Sterilizes or uses high-level disinfection for bag, valve and mask                                     | 1 | 0 | 8         |
| Q436: Decontaminates reusable suction devices in 0.5% chlorine solution                                      | 1 | 0 | 8         |
| Q437: Sterilizes or uses high-level disinfection for reusable suction devices                                | 1 | 0 | 8         |
| Q438: Washes his/her hands with soap and water or uses alcohol hand rub                                      | 1 | 0 | 8         |
| Q439: Record time L&D observation ended                                                                      |   |   |           |
| <i>REMEMBER TO THANK CLIENT AND PROVIDER FOR THEIR PARTICIPATION IN THE STUDY</i>                            |   |   |           |
| <i>END OF SECTION 4 GO TO SECTION 600</i>                                                                    |   |   |           |

MATERNAL AND NEWBORN QUALITY OF CARE FACILITY ASSESSMENT

Labor & Delivery Observation Checklist

Section 5: Checklist for Newborn Resuscitation

| Question                                                                                                                                                                                                                    | Yes         | No        | DK        | Go to        |
|-----------------------------------------------------------------------------------------------------------------------------------------------------------------------------------------------------------------------------|-------------|-----------|-----------|--------------|
| <i>RECORD WHETHER THE PROVIDER CARRIED OUT THE FOLLOWING STEPS AND/OR EXAMINATIONS: (SOME OF THE FOLLOWING STEPS MAY BE PERFORMED SIMULTANEOUSLY OR BY MORE THAN ONE PROVIDER)</i>                                          |             |           |           |              |
| Q501: Record time resuscitation started                                                                                                                                                                                     |             |           |           |              |
| Q502: Clears the airway by suctioning the mouth first and then the nose                                                                                                                                                     | 1           | 0         | 8         |              |
| Q503: Stimulates baby with back rubbing                                                                                                                                                                                     | 1           | 0         | 8         |              |
| Q504: <b>OBSERVER:</b> does newborn starts to breathe or cry spontaneously?                                                                                                                                                 | 1           | 0         |           | Yes→Q531     |
| Q505: Calls for help                                                                                                                                                                                                        | 1           | 0         | 8         |              |
| Q506: Ties or clamps cord immediately                                                                                                                                                                                       | 1           | 0         | 8         |              |
| Q507: Cuts cord with sterile blade or sterile scissors                                                                                                                                                                      | 1           | 0         | 8         |              |
| Q508: Places the newborn on his/her back on a clean, warm surface or towel                                                                                                                                                  | 1           | 0         | 8         |              |
| Q509: Places the head in a slightly extended position to open the airway                                                                                                                                                    | 1           | 0         | 8         |              |
| Q510: Tells the woman (and her support person) what is going to be done                                                                                                                                                     | 1           | 0         | 8         |              |
| Q511: Listens to the woman and provides support and reassurance                                                                                                                                                             | 1           | 0         | 8         |              |
| Q512: Checks mouth, back of throat and nose for secretions, and clears if necessary                                                                                                                                         | 1           | 0         | 8         |              |
| Q513: Places the correct-sized mask on the newborn's face so that it covers the chin, mouth and nose (but not eyes)                                                                                                         | 1           | 0         | 8         |              |
| Q514: Checks the seal by ventilating two times and observing the rise of the chest                                                                                                                                          | 1           | 0         | 8         |              |
| Q515: <b>OBSERVER:</b> is newborn's chest rising in response to ventilation?                                                                                                                                                | 1           | 0         |           | Yes→Q524     |
| Q516: Checks the position of the newborn's head to make sure that the neck is in a slightly extended position (not blocking the airway)                                                                                     | 1           | 0         | 8         |              |
| Q517: Checks mouth, back of throat and nose for secretions, and clears if necessary                                                                                                                                         | 1           | 0         | 8         |              |
| Q518: Checks the seal by ventilating two times and observing the rise of the chest                                                                                                                                          | 1           | 0         | 8         |              |
| Q519: <b>OBSERVER:</b> is newborn's chest rising in response to ventilation?                                                                                                                                                | 1           | 0         |           | Yes→Q524     |
| Q520: Checks the position of the newborn's head again to make sure that the neck is in slightly extended position                                                                                                           | 1           | 0         | 8         |              |
| Q521: Repeats suction of mouth and nose to clear secretions, if necessary                                                                                                                                                   | 1           | 0         | 8         |              |
| Q522: Checks the seal by ventilating two times and observing the rise of the chest                                                                                                                                          | 1           | 0         | 8         |              |
| Q523: <b>OBSERVER:</b> is newborn's chest rising in response to ventilation?                                                                                                                                                | 1           | 0         |           |              |
| <b>IF NEWBORN'S CHEST IS NOT RISING AFTER TWO ATTEMPTS TO READJUST, OBSERVER SHOULD CALL FOR SUPERVISOR TO INTERVENE. IF A HEALTH WORKER COMPETENT IN RESUSCITATION IS NOT AVAILABLE, OBSERVER MAY CHOOSE TO INTERVENE.</b> |             |           |           |              |
| Q524: Ventilates at a rate of 30 to 50 breaths/minute                                                                                                                                                                       | 1           | 0         | 8         |              |
| Q525: Conducts assessment of newborn breathing after 1 minute of ventilation                                                                                                                                                | 1           | 0         |           | No→Q527      |
| Q526: Condition of newborn at assessment                                                                                                                                                                                    | <b>Code</b> |           |           |              |
| Respiration rate 30-50 breaths/minute and no chest indrawing                                                                                                                                                                | 1           |           |           | →Q531        |
| Respiration rate <30 breaths/minute with severe indrawing                                                                                                                                                                   | 2           |           |           |              |
| No spontaneous breathing                                                                                                                                                                                                    | 3           |           |           |              |
|                                                                                                                                                                                                                             | <b>Yes</b>  | <b>No</b> | <b>DK</b> | <b>Go to</b> |
| Q527: Continues Ventilation                                                                                                                                                                                                 | 1           | 0         |           | No→Q531      |
| Q528: Conducts assessment of newborn breathing after prolonged ventilation (10 minutes)                                                                                                                                     | 1           | 0         |           | No→Q530      |
| Q529: Condition of newborn at assessment                                                                                                                                                                                    | <b>Code</b> |           |           |              |
| Respiration rate 30-50 breaths/minute and no chest indrawing                                                                                                                                                                | 1           |           |           | →Q531        |
| Respiration rate <30 breaths/minute with severe indrawing                                                                                                                                                                   | 2           |           |           |              |
| No spontaneous breathing                                                                                                                                                                                                    | 3           |           |           |              |
|                                                                                                                                                                                                                             | <b>Yes</b>  | <b>No</b> | <b>DK</b> | <b>Go to</b> |
| Q530: Continues Ventilation                                                                                                                                                                                                 | 1           | 0         |           |              |
| Q531: Record time that resuscitation actions ended (or time of death if baby died)                                                                                                                                          |             |           |           |              |
| Q532: Was the resuscitation successful? (observer: circle No if newborn died)                                                                                                                                               | 1           | 0         |           |              |
| Q533: Arranges transfer to special care either in facility or to outside facility                                                                                                                                           | 1           | 0         | 8         |              |
| Q534: Explains to the mother (and her support person if available) what happened                                                                                                                                            | 1           | 0         | 8         |              |
| Q535: Listens to mother and responds attentively to her questions and concerns                                                                                                                                              | 1           | 0         | 8         |              |
| Q536: Observer: Did you call for help or intervene during the resuscitation to save the life of newborn?                                                                                                                    | 1           | 0         |           |              |

MATERNAL AND NEWBORN QUALITY OF CARE FACILITY ASSESSMENT  
**Labor & Delivery Observation Checklist**

Q537: PLEASE COMMENT ON THE QUALITY OF CARE PROVIDED:

*Was mother treated respectfully? Informed of procedures to her baby? Was the situation chaotic or calm? Were there any major delays in needed treatment? If so, for what drugs/procedures and why? Were multiple health workers involved? Who? If newborn did not survive, describe the circumstances. Was the mother counseled about the death of newborn?*

END OF SECTION 5 – RETURN TO SECTION 4, Q409

MATERNAL AND NEWBORN QUALITY OF CARE FACILITY ASSESSMENT

Labor & Delivery Observation Checklist

Section 6: Outcome & Review of Documentation

| Question                                                                                                                                               | Code                                           |
|--------------------------------------------------------------------------------------------------------------------------------------------------------|------------------------------------------------|
| <i>COMPLETE THIS SECTION FOR ALL CLIENTS</i>                                                                                                           |                                                |
| <b>CONDITION OF MOTHER &amp; NEWBORN AT END OF OBSERVATION</b>                                                                                         |                                                |
| <b>Q600: Was this section observed?</b> <span style="float: right;"><b>No → Q654</b></span>                                                            |                                                |
| <i>RECORD THE STATUS OF MOTHER AND NEWBORN AT THE END OF FIRST HOUR AFTER BIRTH.</i>                                                                   |                                                |
| Q601: Record outcome for the mother                                                                                                                    |                                                |
| Goes to recuperation ward                                                                                                                              | 1                                              |
| Referred to specialist, same facility                                                                                                                  | 2                                              |
| Goes to surgery, same facility                                                                                                                         | 3                                              |
| Referred, other facility                                                                                                                               | 4                                              |
| Death of mother                                                                                                                                        | 5                                              |
| Don't know                                                                                                                                             | 8                                              |
| Q602: Record outcome for the newborn or fetus                                                                                                          |                                                |
| Goes to normal nursery                                                                                                                                 | 1                                              |
| Referred to specialist, same facility                                                                                                                  | 2                                              |
| Referred, other facility                                                                                                                               | 3                                              |
| Goes to ward with mother                                                                                                                               | 4                                              |
| Newborn death                                                                                                                                          | 5                                              |
| Fresh stillbirth                                                                                                                                       | 6                                              |
| Macerated stillbirth                                                                                                                                   | 7                                              |
| Don't know                                                                                                                                             | 8                                              |
| <b>POTENTIALLY HARMFUL PRACTICES</b>                                                                                                                   |                                                |
| Q603: Did you see any of the following harmful or inappropriate practices by health workers that are never indicated (CIRCLE ALL THAT APPLY)           |                                                |
| Use of enema                                                                                                                                           | A                                              |
| Public shaving                                                                                                                                         | B                                              |
| Apply fundal pressure to hasten delivery of baby or placenta                                                                                           | C                                              |
| Lavage of uterus after delivery                                                                                                                        | D                                              |
| Slap newborn                                                                                                                                           | E                                              |
| Hold newborn upside down                                                                                                                               | F                                              |
| Milking the newborn's chest                                                                                                                            | G                                              |
| Stretching of the perineum                                                                                                                             | H                                              |
| Shout, insult or threaten the woman during labor or after                                                                                              | I                                              |
| Slap, hit or pinch the woman during labor or after                                                                                                     | J                                              |
| None of the above                                                                                                                                      | Y                                              |
| Q604: Did you see any of the following practices done without an appropriate indication (CIRCLE ALL THAT APPLY)                                        |                                                |
| Manual exploration of the uterus after delivery                                                                                                        | A                                              |
| Use of episiotomy                                                                                                                                      | B                                              |
| Aspiration of newborn mouth and nose as soon as head is born                                                                                           | C                                              |
| Restrict food and fluids in labor                                                                                                                      | D                                              |
| None of the above                                                                                                                                      | Y                                              |
| <b>REVIEW PARTOGRAPH AND/OR CHART FOR COMPLETENESS</b>                                                                                                 |                                                |
| <b>Question</b>                                                                                                                                        | <b>Yes</b> <b>No</b> <b>DK</b> <b>Go to</b>    |
| Q605: Was there a newborn resuscitation? ( <i>observer: check answer to Q500</i> )                                                                     | 1            0                       No → Q611 |
| <i>EXAMINE CHART TO DETERMINE WHETHER THE HEALTH WORKER RECORDED THE FOLLOWING INFORMATION:</i>                                                        |                                                |
| Q606: Condition of the newborn at birth                                                                                                                | 1            0            8                    |
| Q607: Procedures necessary to initiate breathing                                                                                                       | 1            0            8                    |
| Q608: Time from birth to initiation of spontaneous breathing or time of death if unsuccessful                                                          | 1            0            8                    |
| Q609: Any clinical observations during resuscitation, including baby vital signs                                                                       | 1            0            8                    |
| Q610: Final outcome of resuscitation measures                                                                                                          | 1            0            8                    |
| <i>EXAMINE PARTOGRAPH IF AVAILABLE</i>                                                                                                                 |                                                |
| Q611: was the partograph used to monitor labor?                                                                                                        | 1            0                       No → Q630 |
| Q612: Which partograph used                                                                                                                            | <b>Code</b>                                    |
| Old WHO partograph (latent phase)                                                                                                                      | 1                                              |
| New WHO partograph (at 4cm dilatation)                                                                                                                 | 2                                              |
| Other partograph                                                                                                                                       | 3                                              |
| <b>Question</b>                                                                                                                                        | <b>Yes</b> <b>No</b> <b>DK</b> <b>Go to</b>    |
| Q613: Initiated use of partograph at the appropriate time according to partograph used (New WHO partograph starts at 4 cm; old version starts at 3 cm) | 1            0            8                    |

**MATERNAL AND NEWBORN QUALITY OF CARE FACILITY ASSESSMENT**  
**Labor & Delivery Observation Checklist**

| <i>EXAMINE PARTOGRAPH TO DETERMINE WHETHER THE HEALTH WORKER RECORDED THE FOLLOWING INFORMATION WHILE THE WOMAN WAS IN ACTIVE LABOR:</i>                                                                                                                                                                                                                                                                                     |             |    |    |              |
|------------------------------------------------------------------------------------------------------------------------------------------------------------------------------------------------------------------------------------------------------------------------------------------------------------------------------------------------------------------------------------------------------------------------------|-------------|----|----|--------------|
| Q614: Fetal heart rate plotted at least every half hour                                                                                                                                                                                                                                                                                                                                                                      | 1           | 0  | 8  |              |
| Q615: Cervical dilatation plotted at least every four hours                                                                                                                                                                                                                                                                                                                                                                  | 1           | 0  | 8  |              |
| Q616: Descent of head plotted at least every four hours                                                                                                                                                                                                                                                                                                                                                                      | 1           | 0  | 8  |              |
| Q617: Frequency and duration of contractions plotted at least every half hour                                                                                                                                                                                                                                                                                                                                                | 1           | 0  | 8  |              |
| Q618: Maternal pulse plotted at least every half hour                                                                                                                                                                                                                                                                                                                                                                        | 1           | 0  | 8  |              |
| Q619: BP recorded at least every four hours                                                                                                                                                                                                                                                                                                                                                                                  | 1           | 0  | 8  |              |
| Q620: Temperature recorded at least every two hours                                                                                                                                                                                                                                                                                                                                                                          | 1           | 0  | 8  |              |
| Q621: OBSERVER: Did you see provider fill out partograph after delivery (with information that should be entered during labor)? (circle Don't Know if partograph use was not observed)                                                                                                                                                                                                                                       | 1           | 0  | 8  |              |
| <i>EXAMINE PARTOGRAPH TO DETERMINE WHETHER THE HEALTH WORKER RECORDED THE FOLLOWING INFORMATION ABOUT THE DELIVERY</i>                                                                                                                                                                                                                                                                                                       |             |    |    |              |
| Q622: Birth time                                                                                                                                                                                                                                                                                                                                                                                                             | 1           | 0  | 8  |              |
| Q623: Delivery method                                                                                                                                                                                                                                                                                                                                                                                                        | 1           | 0  | 8  |              |
| Q624: Birthweight                                                                                                                                                                                                                                                                                                                                                                                                            | 1           | 0  | 8  |              |
| <b>DATA EXTRACTION FROM PARTOGRAPH AND/OR CHART</b>                                                                                                                                                                                                                                                                                                                                                                          |             |    |    |              |
| Q625: Was action line on partograph reached?                                                                                                                                                                                                                                                                                                                                                                                 | 1           | 0  | 8  | No/DK → Q630 |
| Q626: Record time action line was reached                                                                                                                                                                                                                                                                                                                                                                                    |             |    |    |              |
| Q627: If action line reached on partograph, was any <u>definitive</u> action taken?                                                                                                                                                                                                                                                                                                                                          | 1           | 0  | 8  | No/DK → Q630 |
| Q628: Record time action was taken ( <i>observer: enter 99:99 if unknown</i> )                                                                                                                                                                                                                                                                                                                                               |             |    |    |              |
| Q629: What definitive action was taken:                                                                                                                                                                                                                                                                                                                                                                                      | <b>Code</b> |    |    |              |
| Consult with specialist                                                                                                                                                                                                                                                                                                                                                                                                      | 1           |    |    |              |
| Refer to other facility for specialist                                                                                                                                                                                                                                                                                                                                                                                       | 2           |    |    |              |
| Prepare for assisted delivery                                                                                                                                                                                                                                                                                                                                                                                                | 3           |    |    |              |
| Prepare for c-section                                                                                                                                                                                                                                                                                                                                                                                                        | 4           |    |    |              |
| Other (specify _____)                                                                                                                                                                                                                                                                                                                                                                                                        | 6           |    |    |              |
| <i>FOR THE FOLLOWING QUESTIONS: EXAMINE PARTOGRAPH AND/OR CHART TO DETERMINE THE FOLLOWING INFORMATION. IF THE INFORMATION IS NOT IN THE CHART OR PARTOGRAPH, BUT THE OBSERVER KNOWS THE INFORMATION OR PREVIOUSLY RECORDED THE INFORMATION IN ANOTHER SECTION, HE OR SHE SHOULD FILL IN THEIR OWN ANSWER. IF THE INFORMATION IN THE CHART OR PARTOGRAPH DIFFER FROM OBSERVER'S INFORMATION, USE OBSERVER'S INFORMATION.</i> |             |    |    |              |
| Q630: Record age of woman                                                                                                                                                                                                                                                                                                                                                                                                    |             |    |    |              |
| Q631: Record the gravidity of the woman                                                                                                                                                                                                                                                                                                                                                                                      |             |    |    |              |
| Q632: Record the parity of the woman <u>prior to this delivery</u>                                                                                                                                                                                                                                                                                                                                                           |             |    |    |              |
| Q633: Time of admission to labor ward ( <i>observer: enter 99:99 if unknown</i> )                                                                                                                                                                                                                                                                                                                                            |             |    |    |              |
| Q634: Centimeters dilated upon admission to labor ward ( <i>observer: enter 99 if unknown</i> )                                                                                                                                                                                                                                                                                                                              |             |    |    |              |
| Q635: Time membranes ruptured ( <i>observer: enter 99:99 if unknown</i> )                                                                                                                                                                                                                                                                                                                                                    |             |    |    |              |
| Q636: How did the membranes rupture?                                                                                                                                                                                                                                                                                                                                                                                         | <b>Code</b> |    |    |              |
| Spontaneous                                                                                                                                                                                                                                                                                                                                                                                                                  | 1           |    |    |              |
| Artificial                                                                                                                                                                                                                                                                                                                                                                                                                   | 2           |    |    |              |
| Don't know                                                                                                                                                                                                                                                                                                                                                                                                                   | 8           |    |    |              |
| Q637: Type of delivery                                                                                                                                                                                                                                                                                                                                                                                                       |             |    |    |              |
| Spontaneous vaginal                                                                                                                                                                                                                                                                                                                                                                                                          | 1           |    |    |              |
| Assisted (instrumented)                                                                                                                                                                                                                                                                                                                                                                                                      | 2           |    |    |              |
| Caesarean                                                                                                                                                                                                                                                                                                                                                                                                                    | 3           |    |    |              |
| Don't know                                                                                                                                                                                                                                                                                                                                                                                                                   | 8           |    |    |              |
| Q638: Time of birth ( <i>observer: enter 99:99 if unknown</i> )                                                                                                                                                                                                                                                                                                                                                              |             |    |    |              |
| Q639: Birthweight in grams ( <i>observer: enter 9999 if unknown</i> )                                                                                                                                                                                                                                                                                                                                                        |             |    |    |              |
| Q640: Record gestational age at birth in weeks ( <i>observer: enter 99 if unknown</i> )                                                                                                                                                                                                                                                                                                                                      |             |    |    |              |
| Question                                                                                                                                                                                                                                                                                                                                                                                                                     | Yes         | No | DK | Go to        |
| Q641: Was she diagnosed with severe PE/E?                                                                                                                                                                                                                                                                                                                                                                                    | 1           | 0  | 8  | No → Q643    |
| Q642: Was baby delivered within 24 hours of PE diagnosis or within 12 hrs of eclampsia diagnosis?                                                                                                                                                                                                                                                                                                                            | 1           | 0  | 8  |              |

MATERNAL AND NEWBORN QUALITY OF CARE FACILITY ASSESSMENT

Labor & Delivery Observation Checklist

|                                                                                                                                                                                                                                                                                                                                                                                                                                                                                      |             |           |           |              |
|--------------------------------------------------------------------------------------------------------------------------------------------------------------------------------------------------------------------------------------------------------------------------------------------------------------------------------------------------------------------------------------------------------------------------------------------------------------------------------------|-------------|-----------|-----------|--------------|
| Q643: Did the mother have blood loss more than 500mL?                                                                                                                                                                                                                                                                                                                                                                                                                                | 1           | 0         | 8         | No→ Q645     |
| Q644: Was she diagnosed with postpartum hemorrhage?                                                                                                                                                                                                                                                                                                                                                                                                                                  | 1           | 0         | 8         |              |
| Q645: Did the mother develop a fever of 38° C or higher during labor?                                                                                                                                                                                                                                                                                                                                                                                                                | 1           | 0         | 8         | No→ Q647     |
| Q646: Was she diagnosed with chorioamnionitis during labor?                                                                                                                                                                                                                                                                                                                                                                                                                          | 1           | 0         | 8         |              |
| Q647: Were antibiotics administered to mother at any time?                                                                                                                                                                                                                                                                                                                                                                                                                           | 1           | 0         | 8         | No/DK → Q651 |
| Q648: When were antibiotics administered? (CIRCLE ALL THAT APPLY)                                                                                                                                                                                                                                                                                                                                                                                                                    | <b>Code</b> |           |           |              |
| 1st stage                                                                                                                                                                                                                                                                                                                                                                                                                                                                            | A           |           |           |              |
| 2nd stage                                                                                                                                                                                                                                                                                                                                                                                                                                                                            | B           |           |           |              |
| 3rd stage                                                                                                                                                                                                                                                                                                                                                                                                                                                                            | C           |           |           |              |
| Postpartum                                                                                                                                                                                                                                                                                                                                                                                                                                                                           | D           |           |           |              |
| Q649: Why were antibiotics administered? (CIRCLE ALL THAT APPLY)                                                                                                                                                                                                                                                                                                                                                                                                                     |             |           |           |              |
| Treatment for chorioamnionitis                                                                                                                                                                                                                                                                                                                                                                                                                                                       | A           |           |           |              |
| After prelabor rupture of membranes                                                                                                                                                                                                                                                                                                                                                                                                                                                  | B           |           |           |              |
| Preparation for C-section                                                                                                                                                                                                                                                                                                                                                                                                                                                            | C           |           |           |              |
| Routine/prophylactic                                                                                                                                                                                                                                                                                                                                                                                                                                                                 | D           |           |           |              |
| Third stage/postpartum procedure                                                                                                                                                                                                                                                                                                                                                                                                                                                     | E           |           |           |              |
| Don't know                                                                                                                                                                                                                                                                                                                                                                                                                                                                           | Z           |           |           |              |
| Q650: Which antibiotic was administered? (CIRCLE ALL THAT APPLY)                                                                                                                                                                                                                                                                                                                                                                                                                     |             |           |           |              |
| Penicillin                                                                                                                                                                                                                                                                                                                                                                                                                                                                           | A           |           |           |              |
| Ampicillin                                                                                                                                                                                                                                                                                                                                                                                                                                                                           | B           |           |           |              |
| Gentamicin                                                                                                                                                                                                                                                                                                                                                                                                                                                                           | C           |           |           |              |
| Metronidazole                                                                                                                                                                                                                                                                                                                                                                                                                                                                        | D           |           |           |              |
| Cephalosporin                                                                                                                                                                                                                                                                                                                                                                                                                                                                        | E           |           |           |              |
| Other                                                                                                                                                                                                                                                                                                                                                                                                                                                                                | X           |           |           |              |
| Don't know                                                                                                                                                                                                                                                                                                                                                                                                                                                                           | Z           |           |           |              |
| <b>Question</b>                                                                                                                                                                                                                                                                                                                                                                                                                                                                      | <b>Yes</b>  | <b>No</b> | <b>DK</b> | <b>Go to</b> |
| Q651: Is mother HIV positive? (observer: circle Don't Know if status is unknown or was not discussed)                                                                                                                                                                                                                                                                                                                                                                                | 1           | 0         | 8         | No/DK → Q654 |
| Q652: Was newborn given ARV(s)?                                                                                                                                                                                                                                                                                                                                                                                                                                                      | 1           | 0         | 8         | No/DK → Q654 |
| Q653: Record type of ARV(s) given to newborn                                                                                                                                                                                                                                                                                                                                                                                                                                         | <b>Code</b> |           |           |              |
| NVP                                                                                                                                                                                                                                                                                                                                                                                                                                                                                  | 1           |           |           |              |
| AZT                                                                                                                                                                                                                                                                                                                                                                                                                                                                                  | 2           |           |           |              |
| 3TC                                                                                                                                                                                                                                                                                                                                                                                                                                                                                  | 3           |           |           |              |
| Don't know                                                                                                                                                                                                                                                                                                                                                                                                                                                                           | 8           |           |           |              |
| <p>Q654: PLEASE COMMENT ON THE QUALITY OF CARE PROVIDED:<br/>                     Was mother treated respectfully? Informed of procedures to herself and her baby? Was the situation chaotic or calm? Were there any major delays in needed treatment? If so, for what drugs/procedures and why? Were multiple health workers involved? Who? If maternal or newborn/fetal death occurred, describe the circumstances. Was the mother counseled about the death of newborn/fetus?</p> |             |           |           |              |
| <p>END OF SECTION 6 – MAKE SURE THAT Q100, Q200, Q300, Q400, Q600, ARE ANSWERED BEFORE MOVING ON TO NEXT CLIENT</p>                                                                                                                                                                                                                                                                                                                                                                  |             |           |           |              |

**MATERNAL AND NEWBORN QUALITY OF CARE FACILITY ASSESSMENT**  
**Labor & Delivery Observation Checklist**

**Section 7: Observation of Postpartum Hemorrhage**

| Question                                                                                                                                                                                                                                                                  | Yes         | No        | Go to        |
|---------------------------------------------------------------------------------------------------------------------------------------------------------------------------------------------------------------------------------------------------------------------------|-------------|-----------|--------------|
|                                                                                                                                                                                                                                                                           | 1           | 0         |              |
| Q702: Record time complication started                                                                                                                                                                                                                                    |             |           |              |
| <i>RECORD WHETHER THE PROVIDER CARRIED OUT THE FOLLOWING STEPS AND/OR EXAMINATIONS: (SOME OF THE FOLLOWING STEPS MAY BE PERFORMED SIMULTANEOUSLY OR BY MORE THAN ONE PROVIDER). IF TIME OF EVENT IS UNKNOWN, ENTER 99:99. IF DOSE OF MEDICATION IS UNKNOWN, ENTER 99.</i> |             |           |              |
| <b>IMMEDIATE CARE</b>                                                                                                                                                                                                                                                     |             |           |              |
| Q703: Monitors bleeding                                                                                                                                                                                                                                                   | 1           | 0         | No→Q705      |
| Q704: How much bleeding was there (in mL)                                                                                                                                                                                                                                 |             |           |              |
| Q705: Performs uterine massage                                                                                                                                                                                                                                            | 1           | 0         | No→Q707      |
| Q706: Time massage performed                                                                                                                                                                                                                                              |             |           |              |
| Q707: Gives oxytocin                                                                                                                                                                                                                                                      | 1           | 0         | No→Q711      |
| Q708: Record dose (in IU)                                                                                                                                                                                                                                                 |             |           |              |
| Q709: Is route of administration intravenous (IV) through Ringer Lactate /Normal saline?                                                                                                                                                                                  | 1           | 0         |              |
| Q710: Time oxytocin given                                                                                                                                                                                                                                                 |             |           |              |
| Q711: Other uterotonic given                                                                                                                                                                                                                                              | 1           | 0         | No→Q714      |
| Q712: Which other uterotonic was given:                                                                                                                                                                                                                                   | <b>Code</b> |           |              |
| Ergometrine                                                                                                                                                                                                                                                               | 1           |           |              |
| Syntometrine                                                                                                                                                                                                                                                              | 2           |           |              |
| Misoprostol                                                                                                                                                                                                                                                               | 3           |           |              |
| Q713: Time other uterotonic given                                                                                                                                                                                                                                         |             |           |              |
| <b>Question</b>                                                                                                                                                                                                                                                           | <b>Yes</b>  | <b>No</b> | <b>Go to</b> |
| Q714: Performs abdominal exam for uterine contraction                                                                                                                                                                                                                     | 1           | 0         | No→Q716      |
| Q715: Time exam performed                                                                                                                                                                                                                                                 |             |           |              |
| Q716: Examines the vagina and perineum for lacerations and or cervical tear                                                                                                                                                                                               | 1           | 0         | No→Q718      |
| Q717: Time exam performed                                                                                                                                                                                                                                                 |             |           |              |
| Q718: Examines the placenta for completeness                                                                                                                                                                                                                              | 1           | 0         | No→Q720      |
| Q719: Time exam performed                                                                                                                                                                                                                                                 |             |           |              |
| Q720: Starts IV fluids                                                                                                                                                                                                                                                    | 1           | 0         | No→Q722      |
| Q721: Time IV fluids started                                                                                                                                                                                                                                              |             |           |              |
| <b>FOLLOW UP CARE</b>                                                                                                                                                                                                                                                     |             |           |              |
| Q722: Performs uterine exploration                                                                                                                                                                                                                                        | 1           | 0         | No→Q724      |
| Q723: Time procedure performed                                                                                                                                                                                                                                            |             |           |              |
| Q724: Performs uterine mechanical evacuation                                                                                                                                                                                                                              | 1           | 0         | No→Q726      |
| Q725: Time procedure performed                                                                                                                                                                                                                                            |             |           |              |
| Q726: Performs manual removal of the placenta                                                                                                                                                                                                                             | 1           | 0         | No→Q728      |
| Q727: Time procedure performed                                                                                                                                                                                                                                            |             |           |              |
| Q728: Performs bimanual compression of the uterus                                                                                                                                                                                                                         | 1           | 0         | No→Q730      |
| Q729: Time procedure performed                                                                                                                                                                                                                                            |             |           |              |
| Q730: Performs aortic compression                                                                                                                                                                                                                                         | 1           | 0         | No→Q732      |
| Q731: Time procedure performed                                                                                                                                                                                                                                            |             |           |              |
| Q732: Uses balloon/condom tamponade                                                                                                                                                                                                                                       | 1           | 0         | No→Q734      |
| Q733: Time procedure performed                                                                                                                                                                                                                                            |             |           |              |

**MATERNAL AND NEWBORN QUALITY OF CARE FACILITY ASSESSMENT**  
**Labor & Delivery Observation Checklist**

|                                                                                                                                                                                                          |                                  |           |              |
|----------------------------------------------------------------------------------------------------------------------------------------------------------------------------------------------------------|----------------------------------|-----------|--------------|
| Q734: Uses uterine sutures/cutgut                                                                                                                                                                        | 1                                | 0         | No→Q736      |
| Q735: Time procedure performed                                                                                                                                                                           |                                  |           |              |
| Q736: Performs cardiac resuscitation                                                                                                                                                                     | 1                                | 0         | No→Q738      |
| Q737: Time procedure performed                                                                                                                                                                           |                                  |           |              |
| Q738: Sends to surgery for hysterectomy                                                                                                                                                                  | 1                                | 0         | No→Q740      |
| Q739: Time sent to surgery performed                                                                                                                                                                     |                                  |           |              |
| Q740: Performs blood clotting time                                                                                                                                                                       | 1                                | 0         | No→Q742      |
| Q741: Time procedure performed                                                                                                                                                                           |                                  |           |              |
| Q742: Checks haemoglobin/haematocrit                                                                                                                                                                     | 1                                | 0         | No→Q744      |
| Q743: Time procedure performed                                                                                                                                                                           |                                  |           |              |
| Q744: Requests blood grouping and crossmatching                                                                                                                                                          | 1                                | 0         | No→Q746      |
| Q745: Time procedure performed                                                                                                                                                                           |                                  |           |              |
| Q746: Gives blood products                                                                                                                                                                               | 1                                | 0         | No→Q749      |
| Q747: Record number of units                                                                                                                                                                             |                                  |           |              |
| Q748: Time blood given                                                                                                                                                                                   |                                  |           |              |
| Q749: Gives antibiotics                                                                                                                                                                                  | 1                                | 0         | No→Q752      |
| Q750: Which antibiotic was administered? (CIRCLE ALL THAT APPLY)                                                                                                                                         | <b>Code</b>                      |           |              |
|                                                                                                                                                                                                          | Penicillin                       | A         |              |
|                                                                                                                                                                                                          | Ampicillin                       | B         |              |
|                                                                                                                                                                                                          | Gentamicin                       | C         |              |
|                                                                                                                                                                                                          | Metronidazole                    | D         |              |
|                                                                                                                                                                                                          | Cephalosporin                    | E         |              |
|                                                                                                                                                                                                          | Other                            | X         |              |
|                                                                                                                                                                                                          | Don't Know                       | Z         |              |
| Q751: Time antibiotics given                                                                                                                                                                             |                                  |           |              |
| <b>Question</b>                                                                                                                                                                                          | <b>Yes</b>                       | <b>No</b> | <b>Go to</b> |
| Q752: Gives additional dose of oxytocin                                                                                                                                                                  | 1                                | 0         | No→Q756      |
| Q753: Record dose (in IU)                                                                                                                                                                                |                                  |           |              |
| Q754: Is route of administration intravenous (IV)?                                                                                                                                                       | 1                                | 0         |              |
| Q755: Time oxytocin given                                                                                                                                                                                |                                  |           |              |
| Q756: Gives additional dose of other uterotonic                                                                                                                                                          | 1                                | 0         | No→Q759      |
| Q757: Which other uterotonic was given:                                                                                                                                                                  | <b>Code</b>                      |           |              |
|                                                                                                                                                                                                          | Ergometrine                      | 1         |              |
|                                                                                                                                                                                                          | Syntometrine                     | 2         |              |
|                                                                                                                                                                                                          | Misoprostol                      | 3         |              |
| Q758: Time other uterotonic given                                                                                                                                                                        |                                  |           |              |
| <b>Question</b>                                                                                                                                                                                          | <b>Yes</b>                       | <b>No</b> | <b>Go to</b> |
| Q759: Is the woman's condition stable?                                                                                                                                                                   | 1                                | 0         | Yes→Q760     |
| <i>IF THE WOMAN'S CONDITION IS NOT STABLE, CONTINUE OBSERVING UNTIL SHE IS STABLE OR FOR AT LEAST 1 HOUR AFTER THE INITIAL EVENT (IF POSSIBLE). CHECK ANSWERS TO Q722-Q759 AS OBSERVATION CONTINUES.</i> |                                  |           |              |
| Q760: End time of observation                                                                                                                                                                            |                                  |           |              |
| <b>CASE DETAILS</b>                                                                                                                                                                                      |                                  |           |              |
| Q761: What is the woman's diagnosis (CIRCLE ALL THAT APPLY)                                                                                                                                              | <b>Code</b>                      |           |              |
|                                                                                                                                                                                                          | Atonic uterus                    | A         |              |
|                                                                                                                                                                                                          | Laceration                       | B         |              |
|                                                                                                                                                                                                          | Incomplete expulsion of placenta | C         |              |
|                                                                                                                                                                                                          | Placenta attached                | D         |              |
|                                                                                                                                                                                                          | Coagulopathy                     | E         |              |



MATERNAL AND NEWBORN QUALITY OF CARE FACILITY ASSESSMENT

**Labor & Delivery Observation Checklist**

|                                                                       |   |
|-----------------------------------------------------------------------|---|
| Q762: At what stage of labor and delivery did the complication occur: |   |
| At delivery                                                           | 1 |
| Postpartum (before discharge)                                         | 2 |
| After discharge                                                       | 3 |

Q763: PLEASE WRITE A BRIEF SUMMARY OF THE CASE AND THEN DESCRIBE THE CONDITION OF THE WOMAN AT THE END OF OBSERVATION:

Q764: PLEASE COMMENT ON THE QUALITY OF CARE PROVIDED:

*Was the woman left alone at any point even if there was a danger of shock? Was she treated respectfully? Informed of procedures? Was the situation chaotic or calm? Were there any major delays in needed treatment? If so, for what drugs/procedures and why? Were multiple health workers involved? Who?*

END OF SECTION 7 – RETURN TO APPROPRIATE SECTION TO CONTINUE OBSERVATION

**MATERNAL AND NEWBORN QUALITY OF CARE FACILITY ASSESSMENT**  
**Labor & Delivery Observation Checklist**

| Section 8: Observation of Severe Pre-eclampsia and Eclampsia                                                                                                                                                                                                              |             |    |         |
|---------------------------------------------------------------------------------------------------------------------------------------------------------------------------------------------------------------------------------------------------------------------------|-------------|----|---------|
| Question                                                                                                                                                                                                                                                                  | Yes         | No | Go to   |
| Q802: Record the time complication started                                                                                                                                                                                                                                |             |    |         |
| <i>RECORD WHETHER THE PROVIDER CARRIED OUT THE FOLLOWING STEPS AND/OR EXAMINATIONS: (SOME OF THE FOLLOWING STEPS MAY BE PERFORMED SIMULTANEOUSLY OR BY MORE THAN ONE PROVIDER). IF TIME OF EVENT IS UNKNOWN, ENTER 99:99. IF DOSE OF MEDICATION IS UNKNOWN, ENTER 99.</i> |             |    |         |
| <b>IMMEDIATE CARE</b>                                                                                                                                                                                                                                                     |             |    |         |
| Q803: Blood pressure taken                                                                                                                                                                                                                                                | 1           | 0  | No→Q807 |
| Q804: Record blood pressure: systolic                                                                                                                                                                                                                                     |             |    |         |
| Q805: Record blood pressure: diastolic                                                                                                                                                                                                                                    |             |    |         |
| Q806: Time blood pressure taken                                                                                                                                                                                                                                           |             |    |         |
| Q807: Urine checked for protein                                                                                                                                                                                                                                           | 1           | 0  | No→Q810 |
| Q808: Record result                                                                                                                                                                                                                                                       |             |    |         |
| Q809: Time urine checked                                                                                                                                                                                                                                                  |             |    |         |
| Q810: Were IV fluids started?                                                                                                                                                                                                                                             | 1           | 0  | No→Q812 |
| Q811: Time IV fluids given                                                                                                                                                                                                                                                |             |    |         |
| Q812: Magnesium sulfate given <u>intramuscular (IM)</u> ?                                                                                                                                                                                                                 | 1           | 0  | No→Q815 |
| Q813: Record dose in grams                                                                                                                                                                                                                                                |             |    |         |
| Q814: Time magnesium sulfate given IM                                                                                                                                                                                                                                     |             |    |         |
| Q815: Magnesium sulfate given <u>intravenously (IV)</u> ?                                                                                                                                                                                                                 | 1           | 0  | No→Q818 |
| Q816: Record dose in mL                                                                                                                                                                                                                                                   |             |    |         |
| Q817: Time magnesium sulfate given IV                                                                                                                                                                                                                                     |             |    |         |
| Q818: Diazepam given                                                                                                                                                                                                                                                      | 1           | 0  | No→Q822 |
| Q819: Record dose in mg                                                                                                                                                                                                                                                   |             |    |         |
| Q820: Diazepam given intravenously (IV)?                                                                                                                                                                                                                                  | 1           | 0  |         |
| Q821: Time diazepam given                                                                                                                                                                                                                                                 |             |    |         |
| Q822: Antihypertensive given                                                                                                                                                                                                                                              | 1           | 0  | No→Q827 |
| Q823: Which antihypertensive was given:                                                                                                                                                                                                                                   | <b>Code</b> |    |         |
| Hydralazine/ Apresoline                                                                                                                                                                                                                                                   | 1           |    |         |
| Nifedipine                                                                                                                                                                                                                                                                | 2           |    |         |
| Labetalol                                                                                                                                                                                                                                                                 | 3           |    |         |
| Methyldopa/ Aldomet                                                                                                                                                                                                                                                       | 4           |    |         |
| Other (specify_____)                                                                                                                                                                                                                                                      | 6           |    |         |
| Q824: Record dose in mg                                                                                                                                                                                                                                                   |             |    |         |
| Q825: Route of administration                                                                                                                                                                                                                                             |             |    |         |
| Intramuscular (IM)                                                                                                                                                                                                                                                        | 1           |    |         |
| Intravenous (IV)                                                                                                                                                                                                                                                          | 2           |    |         |
| Oral/sublingual                                                                                                                                                                                                                                                           | 3           |    |         |
| Q826: Time antihypertensive given                                                                                                                                                                                                                                         |             |    |         |
| <b>FOLLOW UP CARE</b>                                                                                                                                                                                                                                                     |             |    |         |
| Question                                                                                                                                                                                                                                                                  | Yes         | No | Go to   |
| Q827: Urinary catheter placed                                                                                                                                                                                                                                             | 1           | 0  | No→Q829 |
| Q828: Time catheter placed                                                                                                                                                                                                                                                |             |    |         |

MATERNAL AND NEWBORN QUALITY OF CARE FACILITY ASSESSMENT

Labor & Delivery Observation Checklist

|                                                                                                                                                                                                          |             |           |              |
|----------------------------------------------------------------------------------------------------------------------------------------------------------------------------------------------------------|-------------|-----------|--------------|
| Q829: Labor induced or augmented (including artificial rupture of membranes)                                                                                                                             | 1           | 0         | No→Q831      |
| Q830: Time labor induced or augmented                                                                                                                                                                    |             |           |              |
| Q831: Sent to surgery for c-section                                                                                                                                                                      | 1           | 0         | No→Q833      |
| Q832: Time sent for surgery                                                                                                                                                                              |             |           |              |
| Q833: Gives additional dose of magnesium sulfate                                                                                                                                                         | 1           | 0         | No→Q837      |
| Q834: Record dose in grams                                                                                                                                                                               |             |           |              |
| Q835: Magnesium sulfate given intramuscular (IM)?                                                                                                                                                        | 1           | 0         |              |
| Q836: Time magnesium sulfate given                                                                                                                                                                       |             |           |              |
| Q837: Gives additional dose of other medication                                                                                                                                                          | 1           | 0         | No→Q842      |
| Q838: Which medication(s) was the client given (CIRCLE ALL THAT APPLY)                                                                                                                                   | <b>Code</b> |           |              |
| Diazepam                                                                                                                                                                                                 | A           |           |              |
| Hydralazine/ Apresoline                                                                                                                                                                                  | B           |           | →Q842        |
| Nifedipine                                                                                                                                                                                               | C           |           | →Q842        |
| Labetalol                                                                                                                                                                                                | D           |           | →Q842        |
| Methyldopa/ Aldomet                                                                                                                                                                                      | E           |           | →Q842        |
| Other (specify_____)                                                                                                                                                                                     | X           |           | →Q842        |
| Q839: Record dose in mg for diazepam                                                                                                                                                                     |             |           |              |
| <b>Question</b>                                                                                                                                                                                          | <b>Yes</b>  | <b>No</b> | <b>Go to</b> |
| Q840: Diazepam given intravenously (IV)?                                                                                                                                                                 | 1           | 0         |              |
| Q841: Time diazepam given                                                                                                                                                                                |             |           |              |
| Q842: Calcium gluconate given                                                                                                                                                                            | 1           | 0         | No→Q844      |
| Q843: Time calcium gluconate given                                                                                                                                                                       |             |           |              |
| <b>MONITORING</b>                                                                                                                                                                                        |             |           |              |
| Q844: How many times in the first hour of observation was blood pressure taken                                                                                                                           | <b>Code</b> |           |              |
| Blood pressure not taken during first hour                                                                                                                                                               | 0           |           |              |
| Once                                                                                                                                                                                                     | 1           |           |              |
| Twice                                                                                                                                                                                                    | 2           |           |              |
| Three times                                                                                                                                                                                              | 3           |           |              |
| Four times                                                                                                                                                                                               | 4           |           |              |
| Five or more                                                                                                                                                                                             | 5           |           |              |
| Q845: How many times in the first hour of observation were reflexes checked                                                                                                                              |             |           |              |
| Reflexes not checked during first hour                                                                                                                                                                   | 0           |           |              |
| Once                                                                                                                                                                                                     | 1           |           |              |
| Twice                                                                                                                                                                                                    | 2           |           |              |
| Three times                                                                                                                                                                                              | 3           |           |              |
| Four times                                                                                                                                                                                               | 4           |           |              |
| Five or more                                                                                                                                                                                             | 5           |           |              |
| Q846: How many times in the first hour of observation were respirations checked                                                                                                                          |             |           |              |
| Respirations not checked during first hour                                                                                                                                                               | 0           |           |              |
| Once                                                                                                                                                                                                     | 1           |           |              |
| Twice                                                                                                                                                                                                    | 2           |           |              |
| Three times                                                                                                                                                                                              | 3           |           |              |
| Four times                                                                                                                                                                                               | 4           |           |              |
| Five or more                                                                                                                                                                                             | 5           |           |              |
| <b>Question</b>                                                                                                                                                                                          | <b>Yes</b>  | <b>No</b> | <b>Go to</b> |
| Q847: Is the woman's condition stable?                                                                                                                                                                   | 1           | 0         |              |
| <i>IF THE WOMAN'S CONDITION IS NOT STABLE, CONTINUE OBSERVING UNTIL SHE IS STABLE OR FOR AT LEAST 1 HOUR AFTER THE INITIAL EVENT (IF POSSIBLE). CHECK ANSWERS TO Q826-Q846 AS OBSERVATION CONTINUES.</i> |             |           |              |
| Q848: End time of observation                                                                                                                                                                            |             |           |              |
| <b>CASE DETAILS</b>                                                                                                                                                                                      |             |           |              |
| Q849: What is the woman's diagnosis                                                                                                                                                                      | <b>Code</b> |           |              |
| Eclampsia                                                                                                                                                                                                | 1           |           |              |
| Severe pre-eclampsia                                                                                                                                                                                     | 2           |           |              |
| Other (specify_____)                                                                                                                                                                                     | 3           |           |              |

**MATERNAL AND NEWBORN QUALITY OF CARE FACILITY ASSESSMENT**  
**Labor & Delivery Observation Checklist**

| Question                                                                                                                                                                                                                                                                                                                                                                                  | Yes         | No | Go to |
|-------------------------------------------------------------------------------------------------------------------------------------------------------------------------------------------------------------------------------------------------------------------------------------------------------------------------------------------------------------------------------------------|-------------|----|-------|
| Q850: Was the woman ever unconscious                                                                                                                                                                                                                                                                                                                                                      | 1           | 0  |       |
| Q851: Did the woman experience convulsions                                                                                                                                                                                                                                                                                                                                                | 1           | 0  |       |
| Q852: At what stage of labor and delivery did the complication occur:                                                                                                                                                                                                                                                                                                                     | <b>Code</b> |    |       |
| Before labor (including admissions from ANC)                                                                                                                                                                                                                                                                                                                                              | 1           |    |       |
| During labor                                                                                                                                                                                                                                                                                                                                                                              | 2           |    |       |
| At delivery                                                                                                                                                                                                                                                                                                                                                                               | 3           |    |       |
| Postpartum (before discharge)                                                                                                                                                                                                                                                                                                                                                             | 4           |    |       |
| After discharge                                                                                                                                                                                                                                                                                                                                                                           | 5           |    |       |
| Q853: PLEASE WRITE A BRIEF SUMMARY OF THE CASE AND THEN DESCRIBE THE CONDITION OF THE WOMAN AT THE END OF OBSERVATION                                                                                                                                                                                                                                                                     |             |    |       |
| <p>Q854: PLEASE COMMENT ON THE QUALITY OF CARE PROVIDED:<br/> <i>Was the woman left alone at any point even if there was a danger of convulsions? Was she treated respectfully? Informed of procedures? Was the situation chaotic or calm? Were there any major delays in needed treatment? If so, for what drugs/procedures and why? Were multiple health workers involved? Who?</i></p> |             |    |       |
| <p><i>END OF SECTION 8 – IF CLIENT IS IN LABOR OR HAS ALREADY DELIVERED, PLEASE RETURN TO APPROPRIATE SECTION TO CONTINUE OBSERVATION; IF CLIENT HAS NOT DELIVERED AND IS NOT IN LABOR PLEASE MAKE SURE THAT YOU HAVE ANSWERED Q100, Q200, Q300, Q400, Q500, Q601-Q604, AND Q700 BEFORE MOVING ON TO NEXT CLIENT.</i></p>                                                                 |             |    |       |
